# Supplementary material for: The Tibetan Antelope Population Depends on Lakes on the Tibetan Plateau
Source: MDPI journal article supplement (doi:10.3390/ani13233614), 2023-11-22

**Figure S1.** Male Tibetan antelope, photographed in Changtang National Nature Reserve, Tibet.

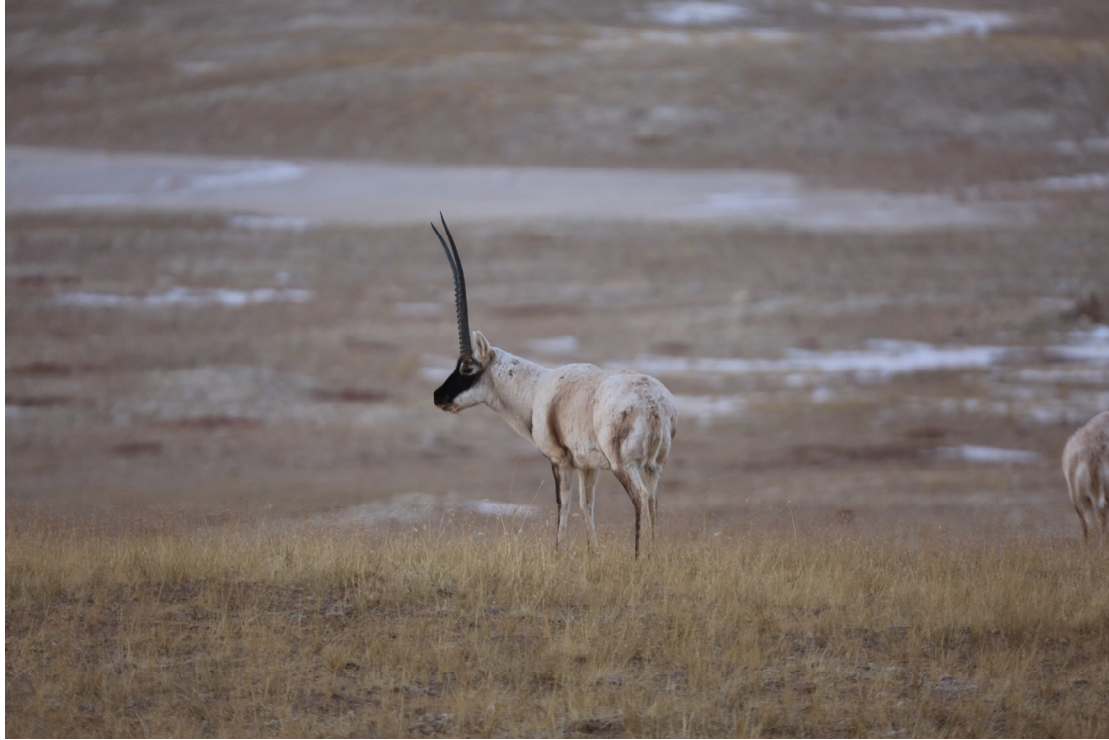

**Figure S2.** Female Tibetan antelope, photographed in Hoh Xil National Nature Reserve, Qinghai.

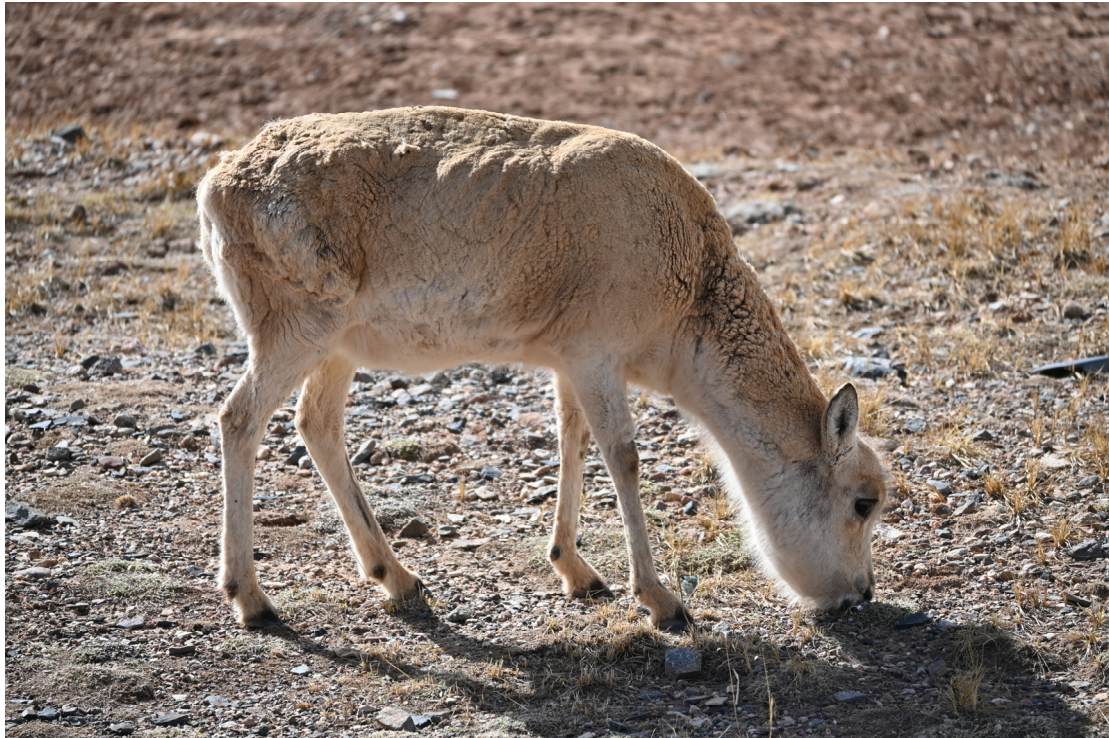



**Figure S3.** Manasarovar in Tibet.

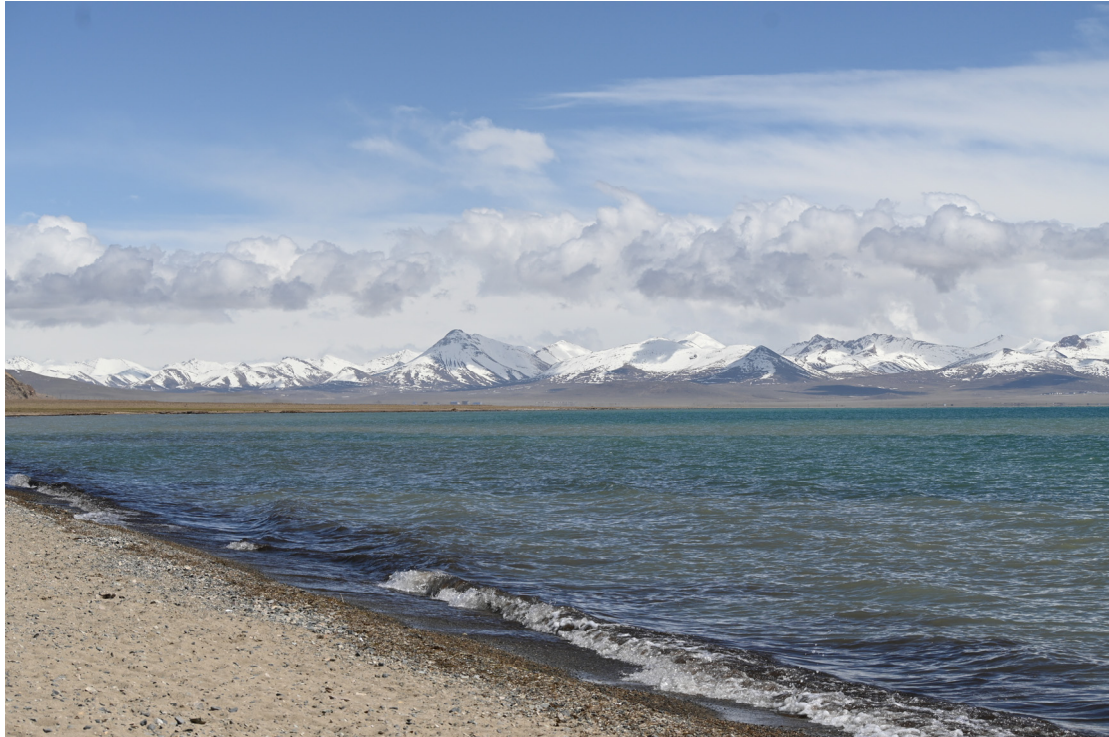

**Figure S4.** Zhaling Lake in Qinghai.

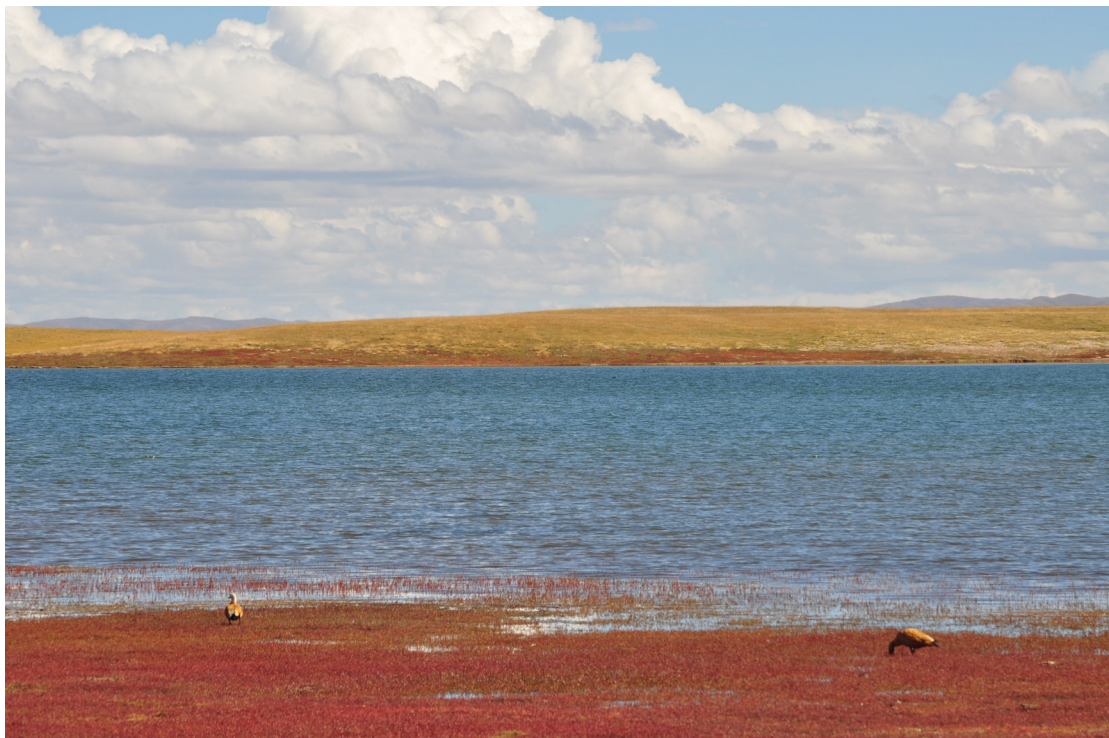

**Figure S5.** Selinco in Tibet.

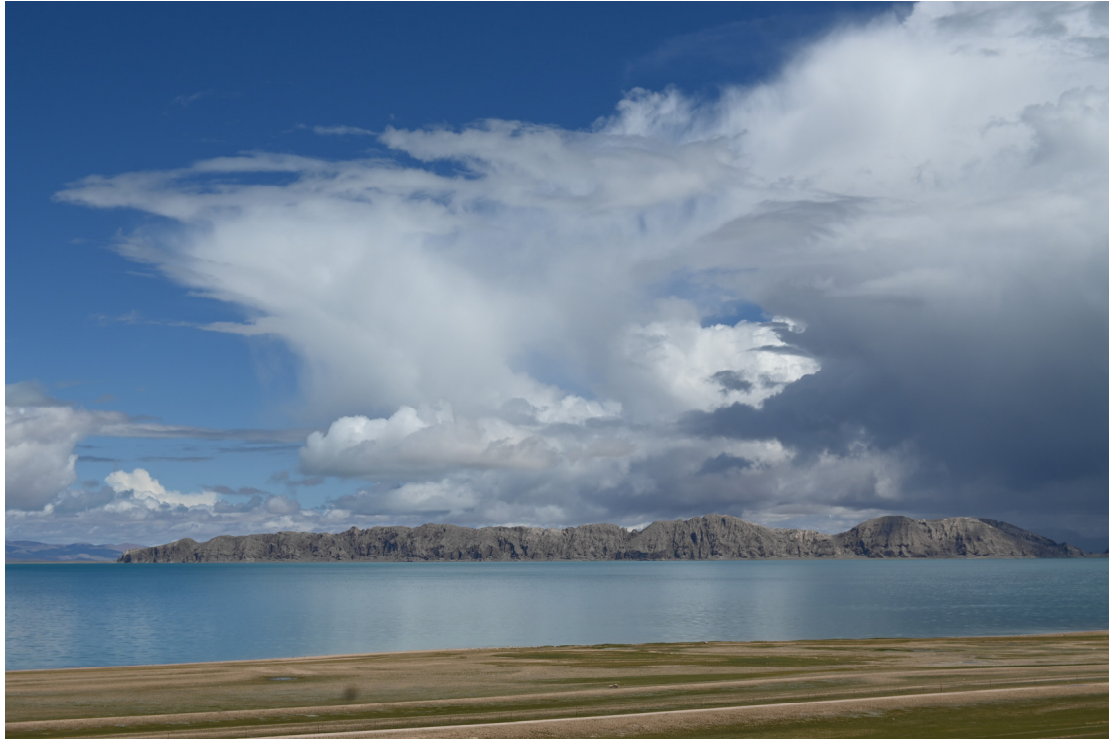

**Figure S6.** Pangong Lake in Tibet.

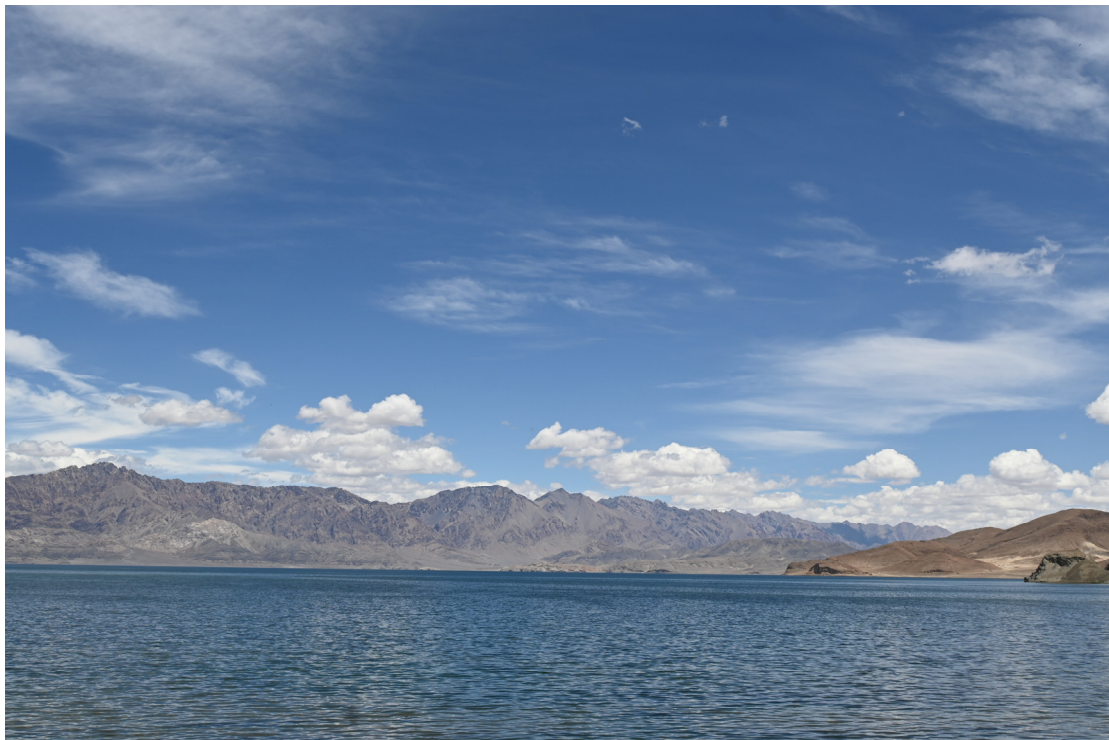

Supplement: s1 [file s1]
