# Supplementary material for: The Tibetan Antelope Population Depends on Lakes on the Tibetan Plateau
Source: Animals (Basel). 2023 Nov 22;13(23):3614. doi: 10.3390/ani13233614 (PMC10705376; doi:10.3390/ani13233614)
Supplement: Supplementary file 1 [file animals-13-03614-s001.zip]

Archive with 4 entries (4 files):
- animals-2604328-Supplementary Figures.pdf
- Table S1 Relationship between distance and slope.xlsx
- Table S2 Relationship between individual numbers of Tibetan antelope and lake area.xlsx
- Table S3 Vegetation sample data.xls
