# Supplementary material for: The Tibetan Antelope Population Depends on Lakes on the Tibetan Plateau
Source: Animals (Basel). 2023 Nov 22;13(23):3614. doi: 10.3390/ani13233614 (PMC10705376; doi:10.3390/ani13233614)
Supplement: Supplementary file 1 [file animals-13-03614-s001.zip › Table S1 Relationship between distance and slope.xlsx]

## Sheet: Sheet3
sample	radom sites	sampledis (m)	sampledeg
0	966	1018	6.12408
0	967	3583	7.62653
0	968	8447	15.5571
0	969	6577	16.2628
0	970	0	0.935468
0	971	4749	16.4779
0	972	8510	26.0244
0	973	3252	7.70213
0	974	3781	4.5657
0	975	1926	4.10316
0	976	6300	1.22404
0	977	5889	19.7982
0	978	509	2.55456
0	979	7247	5.2197
0	980	9356	18.4659
0	981	3671	4.83739
0	982	3476	16.905
0	983	7205	3.1286
0	984	11189	15.9274
0	1097	5707	16.8845
0	1098	12861	14.5365
0	1099	8477	16.6794
0	1100	8550	12.6662
0	1101	4646	24.458
0	1102	7309	26.288
0	1103	7448	18.5931
0	1104	9977	20.877
0	1105	12805	11.909
0	1106	8820	11.6892
0	1107	4532	23.4724
0	1108	8663	18.3871
0	1109	3806	13.3794
0	1110	10883	6.96817
0	1111	8886	8.65499
0	1112	12283	19.4436
0	1113	4374	14.9485
0	1114	13586	9.53922
0	1115	5369	13.4665
0	1116	9678	21.868
0	1117	6725	29.1594
0	1118	11103	13.9324
0	1119	7046	31.8597
0	1120	11020	24.1695
0	1121	10924	24.0374
0	1212	7586	15.1258
0	1213	7393	17.7292
0	1214	9565	37.1564
0	1215	5601	23.0777
0	1216	4269	9.53801
0	1217	8597	30.2329
1	1371	9817	9.45404
1	1372	2885	18.918
1	1373	7579	24.0669
1	1374	8239	27.4196
1	1375	9311	15.5309
1	1376	10387	12.2526
1	1377	9816	33.1179
1	1378	6030	23.9438
1	1379	10908	11.6313
1	1450	1006	16.4844
1	1451	11391	29.1669
1	1452	2124	24.387
1	1453	1026	19.359
1	1454	4628	7.19217
1	1455	9619	33.222
1	1456	10996	15.2074
1	1457	3150	5.91706
1	1458	6465	20.9179
1	1459	6764	29.7678
1	1460	8851	27.2655
1	1461	3617	25.4596
1	1462	9819	7.5811
1	1463	2540	17.4857
1	1464	6778	14.2457
1	1465	360	6.7791
1	1466	8655	8.02404
1	1467	4791	33.6264
1	1468	10031	8.17608
1	1469	1127	39.1511
1	1470	9688	11.5746
1	1471	3784	28.5508
1	1472	7353	19.8839
1	1473	270	17.4221
1	1474	3241	21.2715
1	1475	5220	31.5062
1	1476	5047	20.8232
1	1477	2975	16.6412
1	1478	5508	11.9507
1	1479	9811	35.4823
1	1592	9502	19.4058
1	1593	10325	17.4215
1	1594	4824	15.9434
1	1595	2791	18.0984
1	1596	13995	26.001
1	1597	8711	17.4775
1	1598	2052	10.0666
1	1599	13785	27.8703
1	1600	11515	14.5512
1	1601	9761	6.54221
1	1602	5192	35.1056
2	1767	7633	15.8345
2	1768	5047	19.0062
2	1769	8589	22.4861
2	1770	8338	4.45897
2	1771	8792	7.60808
2	1772	3703	15.12
2	1898	576	31.322
2	1899	5760	29.0803
2	1900	685	30.6642
2	1901	6048	15.1733
2	1902	3056	13.9284
2	1903	5047	18.3066
2	1904	4526	26.0389
2	1905	6575	10.5288
2	1906	5556	18.0021
2	1907	2803	25.7217
2	1908	6775	11.0867
2	1909	4215	14.346
2	1910	7220	18.3961
2	1911	4387	18.6889
2	1912	6868	26.3756
2	1913	6684	37.3537
2	1914	3246	15.5348
2	1915	1350	15.6734
2	1916	1094	31.8621
2	1917	5402	26.8957
2	1918	1451	28.1408
2	1919	2737	23.3871
2	1920	4933	27.3508
2	1921	6522	28.0203
2	1922	6557	22.4186
2	1923	2163	15.9162
2	1924	450	23.8062
2	1925	8694	8.12166
2	1926	8827	6.98839
2	1927	7952	19.8504
2	2140	2052	14.5607
2	2141	0	9.32346
2	2142	5273	27.1606
2	2143	3103	12.3154
2	2144	3057	12.4658
2	2145	3444	30.132
2	2146	1053	7.14795
2	2147	5191	21.6819
2	2148	3061	20.9489
2	2149	1965	20.3407
2	2150	2720	22.2118
2	2151	4202	20.4374
2	2152	7089	23.0594
2	2153	2737	15.7286
3	2357	11195	20.6965
3	2358	5916	7.29746
3	2359	12011	19.7637
3	2360	9703	21.0761
3	2361	9704	26.7228
3	2362	11250	10.8177
3	2363	6072	22.7336
3	2364	7764	11.7328
3	2365	994	29.01
3	2366	11970	8.07553
3	2367	7967	21.4557
3	2483	926	17.3887
3	2484	1173	10.3857
3	2485	254	0.489678
3	2486	201	2.84671
3	2487	7116	10.6837
3	2488	90	23.7378
3	2489	4680	29.5266
3	2490	3798	26.9755
3	2491	9543	22.5715
3	2492	3951	9.43997
3	2493	8452	17.2077
3	2494	6016	30.7396
3	2495	2701	21.7422
3	2496	5508	23.4686
3	2497	9499	9.98573
3	2498	8427	12.8717
3	2499	5142	10.384
3	2500	4187	27.1884
3	2501	2305	18.8958
3	2502	969	28.6364
3	2503	655	27.0597
3	2504	270	25.8336
3	2505	524	6.54221
3	2687	6668	30.1718
3	2688	5328	25.1251
3	2689	2250	22.1398
3	2690	3710	26.72
3	2691	6682	13.9633
3	2692	8082	22.5638
3	2693	3984	10.3652
3	2694	9297	18.1297
3	2695	4269	9.99265
3	2696	5318	31.1921
3	2697	1698	26.0677
3	2698	7539	18.7025
3	2699	3151	22.7338
3	2700	8567	18.8325
3	2701	4873	26.522
3	2702	6441	30.3367
4	2703	1622	3.50128
4	2704	547	12.7033
4	2705	2430	27.8178
4	2706	1260	15.0259
4	2707	90	3.08052
4	2708	1497	3.09599
4	2881	6570	29.5266
4	2882	2235	14.8822
4	2883	1049	25.2606
4	2884	371	7.24096
4	2885	0	11.4627
4	2886	4343	13.2298
4	2887	4334	14.2902
4	2888	3628	28.0939
4	2889	2982	23.6585
4	2890	2713	25.893
4	2891	636	23.4554
4	2892	324	2.97599
4	2893	5223	13.0204
4	2894	3978	18.9232
4	2895	6128	25.8497
4	2896	5692	28.3164
4	2897	1423	28.1858
4	2898	3760	25.44
4	2899	4195	23.5525
4	2900	4374	10.6939
4	2901	2456	2.8404
4	2902	1224	18.3163
4	2903	969	22.3876
4	3061	3474	17.5499
4	3062	1405	21.566
4	3063	3743	10.6709
4	3064	2795	18.7063
4	3065	2578	19.7926
4	3066	2971	27.8187
4	3067	3823	25.2649
4	3068	2534	27.753
4	3069	1328	6.553
4	3070	630	5.05929
4	3071	1527	21.5839
4	3072	4468	19.703
4	3073	4910	24.4574
4	3074	360	29.2348
4	3075	127	0.882731
4	3076	3402	24.3567
4	3077	458	14.0526
4	3078	2826	30.636
4	3079	569	22.2639
4	3080	9363	21.4331
4	3081	9780	18.511
5	2904	5267	23.1768
5	2905	3427	10.938
5	2906	8588	12.6856
5	2907	5355	20.3954
5	2908	6520	9.5271
5	2909	1975	26.8794
5	2910	8895	15.4942
5	2911	7773	24.0972
5	2912	1272	25.3566
5	2913	7675	16.2856
5	2914	8291	11.7785
5	2915	9022	1.3183
5	2916	4871	10.8045
5	2917	6849	24.6577
5	2918	4155	26.4626
5	2919	8315	28.4673
5	2920	6883	21.1426
5	2921	8058	13.8282
5	2922	5526	18.0767
5	2923	9678	4.25695
5	2924	9022	11.7516
5	2925	3584	24.3703
5	2926	7225	21.0155
5	3082	1440	33.4929
5	3083	1768	24.269
5	3084	2423	15.3074
5	3085	1629	10.7302
5	3086	1855	20.2191
5	3087	324	28.3458
5	3088	1207	34.4485
5	3089	2401	25.3992
5	3090	725	21.1626
5	3091	8251	7.01105
5	3092	1083	22.4968
5	3093	768	31.2939
5	3094	1574	28.3163
5	3095	2558	11.9204
5	3096	904	20.2251
5	3097	8190	20.0885
5	3098	8273	21.8673
5	3099	5850	18.0509
5	3100	2723	23.7258
5	3101	7916	19.6594
5	3148	6062	14.8394
5	3149	5810	12.5445
5	3150	3244	27.4303
5	3151	7010	14.7776
5	3152	8146	20.0693
5	3153	7885	28.5945
5	3154	8331	29.3422
6	2506	13664	24.984
6	2507	6430	18.0984
6	2508	2430	20.3196
6	2509	13559	18.6808
6	2510	11387	40.6618
6	2511	6198	14.1976
6	2512	10163	33.204
6	2513	8875	34.768
6	2514	11285	36.9418
6	2515	11343	18.0393
6	2516	9090	14.2143
6	2709	8966	19.355
6	2710	1982	7.0703
6	2711	9727	18.11
6	2712	1907	6.63074
6	2713	6091	11.9237
6	2714	11341	14.909
6	2715	6443	22.1398
6	2716	3600	9.06519
6	2717	6678	22.281
6	2718	8532	10.1802
6	2719	7769	28.5415
6	2720	8678	15.6395
6	2721	8862	16.2886
6	2722	2616	15.0676
6	2723	2623	10.3984
6	2724	4770	6.25849
6	2927	2754	11.4041
6	2928	2191	21.7336
6	2929	7398	10.8668
6	2930	2235	22.219
6	2931	6173	18.5034
6	2932	4992	8.69787
6	2933	6046	25.7155
6	2934	6689	13.1311
6	2935	7922	7.21986
6	2936	1855	22.8219
6	2937	6199	15.7358
6	2938	1913	28.4601
6	2939	3820	19.4003
6	2940	7594	31.6541
6	2941	2952	15.2121
6	2942	6915	17.7817
6	2943	5672	17.2713
6	2944	5325	16.18
6	2945	9780	12.6182
6	2946	5328	18.0158
6	2947	8117	25.3273
6	2948	3907	26.7783
6	2949	10291	10.3614
7	2301	8897	14.1724
7	2302	2881	25.2765
7	2303	5905	7.40515
7	2368	2610	17.1944
7	2369	3628	20.5183
7	2370	254	3.03953
7	2371	4452	35.8309
7	2372	2975	34.4454
7	2373	3973	20.995
7	2374	5086	27.6484
7	2375	2507	4.81154
7	2376	4677	15.8509
7	2377	2743	9.16058
7	2378	5002	32.1417
7	2379	7607	33.9275
7	2380	8209	38.834
7	2381	2659	18.7299
7	2382	1423	15.1651
7	2383	324	17.2468
7	2384	3381	21.1816
7	2385	1183	31.7778
7	2386	2705	25.41
7	2387	4391	27.1089
7	2388	2991	22.5434
7	2389	450	25.5845
7	2390	1907	25.9973
7	2391	2611	23.1689
7	2517	2167	24.3674
7	2518	1659	11.5923
7	2519	180	9.45404
7	2520	1926	3.635
7	2521	1898	10.6327
7	2522	8836	15.0698
7	2523	1913	8.11663
7	2524	7562	18.4651
7	2525	6971	7.41149
7	2526	4510	27.2133
7	2527	6037	26.8126
7	2528	4791	17.2713
7	2529	3569	25.0872
7	2530	2659	9.18332
7	2531	9450	20.4861
7	2532	6121	30.5909
7	2533	9535	24.5523
7	2534	7997	15.8332
7	2535	324	35.2309
7	2536	648	6.20832
7	2537	939	8.75912
7	2538	6384	9.49917
7	2539	7612	7.73397
8	2540	7955	16.316
8	2541	4811	29.5155
8	2542	3759	25.2758
8	2543	3330	26.8701
8	2544	4590	28.6276
8	2545	829	30.6573
8	2725	11258	33.5863
8	2726	5091	18.0405
8	2727	13163	35.0484
8	2728	10055	34.6719
8	2729	9217	10.0963
8	2730	12601	20.17
8	2731	524	31.051
8	2732	13559	15.57
8	2733	13304	10.5868
8	2734	14032	34.0708
8	2735	7689	31.2733
8	2736	8844	12.7298
8	2737	4217	30.484
8	2738	6985	23.9322
8	2739	7776	8.48939
8	2740	2167	10.8193
8	2741	1049	32.482
8	2742	15023	25.3616
8	2743	7318	23.3084
8	2744	17805	39.4234
8	2745	18832	34.1422
8	2746	5182	24.0958
8	2747	14630	37.5063
8	2950	16747	10.432
8	2951	21196	22.9122
8	2952	5766	20.1361
8	2953	9044	37.3851
8	2954	20429	4.98129
8	2955	11583	22.3063
8	2956	90	22.276
8	2957	4226	21.7248
8	2958	11576	30.047
8	2959	9668	32.0971
8	2960	18969	16.2304
8	2961	6977	22.1882
8	2962	10613	31.5296
8	2963	16166	17.3072
8	2964	15197	11.6819
8	2965	4175	21.3734
8	2966	12492	26.5649
8	2967	15044	15.1733
8	2968	13661	20.414
8	2969	13201	11.6625
8	2970	6698	18.9812
9	2971	4454	19.179
9	2972	13468	5.22878
9	2973	10484	24.576
9	2974	5860	32.8026
9	2975	3025	32.0607
9	2976	10209	34.2136
9	2977	5220	26.8952
9	2978	9459	26.6843
9	2979	7938	32.2809
9	2980	3879	14.0652
9	2981	13771	29.1224
9	2982	5580	23.5095
9	2983	4992	20.6948
9	2984	13833	23.2279
9	2985	6054	37.8064
9	2986	11613	26.1333
9	2987	11982	24.6712
9	2988	12521	22.1327
9	2989	4493	33.0063
9	2990	6761	25.8133
9	2991	4462	23.2822
9	3102	324	31.0456
9	3103	1083	29.1822
9	3104	0	30.3303
9	3105	3690	30.6865
9	3106	1138	31.0867
9	3107	4320	19.9539
9	3108	1376	34.3862
9	3109	180	23.205
9	3110	3538	31.0054
9	3111	1890	22.2453
9	3112	1820	30.4565
9	3113	4863	31.4442
9	3114	90	8.05599
9	3115	2160	26.7553
9	3116	90	40.4861
9	3117	2574	14.8888
9	3118	371	34.0129
9	3119	180	2.25619
9	3120	0	16.6832
9	3121	3262	32.8464
9	3122	1098	31.454
9	3123	1080	29.6057
9	3124	3300	22.7874
9	3155	8282	30.9679
9	3156	5785	24.3567
9	3157	7430	17.5544
9	3158	3036	28.8987
9	3159	5457	35.9321
9	3160	6316	7.68464
10	2392	5566	27.5044
10	2393	7570	30.758
10	2394	4236	26.5883
10	2395	5355	13.4458
10	2396	3462	20.3697
10	2397	8574	15.1103
10	2398	6761	22.3615
10	2399	7524	20.5504
10	2400	9470	12.0464
10	2401	4612	24.8344
10	2402	8827	33.4938
10	2403	7193	23.2936
10	2404	9600	23.9265
10	2405	5531	19.9567
10	2406	5149	12.6231
10	2407	9511	27.3685
10	2408	6542	28.66
10	2409	4860	15.6281
10	2546	3349	31.9393
10	2547	4701	17.1706
10	2548	4090	17.1558
10	2549	201	18.3961
10	2550	1026	31.3606
10	2551	4982	20.0554
10	2552	1622	24.8126
10	2553	4917	10.1185
10	2554	524	18.8851
10	2555	1370	27.6484
10	2556	2995	28.5179
10	2557	2778	27.2936
10	2558	3604	30.5285
10	2559	3330	9.65832
10	2560	270	27.1453
10	2561	127	20.3843
10	2562	254	22.1935
10	2563	3768	9.90933
10	2564	1049	8.96419
10	2565	4230	30.0214
10	2566	990	30.9285
10	2748	2251	13.8174
10	2749	3075	28.8126
10	2750	6120	21.566
10	2751	6465	32.3363
10	2752	5816	27.6517
10	2753	4230	21.999
10	2754	5079	33.1865
10	2755	5672	11.848
10	2756	5401	6.41485
10	2757	7603	34.6025
10	2758	6316	25.7044
11	3255	4276	30.9568
11	3256	4121	6.93435
11	3257	7688	38.7923
11	3258	2052	18.1907
11	3259	4129	29.298
11	3260	6812	7.84658
11	3261	5692	14.0033
11	3306	7325	30.2292
11	3307	1263	2.44696
11	3308	3180	13.6896
11	3309	2707	18.6675
11	3310	1654	3.32651
11	3311	5724	15.5888
11	3312	1173	2.30082
11	3313	1113	1.88954
11	3314	4009	9.72677
11	3315	10158	38.9816
11	3316	2391	17.8436
11	3317	11084	7.27008
11	3318	6592	3.45324
11	3319	8290	22.3726
11	3320	6638	25.5845
11	3321	6417	26.0366
11	3322	1465	4.39313
11	3323	8464	21.1927
11	3324	7782	15.1474
11	3325	7009	19.7472
11	3326	10990	19.0103
11	3327	11212	13.3973
11	3374	9276	10.5021
11	3375	11322	20.2309
11	3376	3003	12.2489
11	3377	9175	11.4741
11	3378	10759	31.0819
11	3379	11843	13.9669
11	3380	13446	18.5337
11	3381	6199	3.96287
11	3382	9440	15.2074
11	3383	6390	15.0607
11	3384	8083	11.9161
11	3385	10516	27.0873
11	3386	5202	12.0632
11	3387	6833	37.8483
11	3388	7478	3.79545
11	3389	9519	20.1988
11	3390	13295	17.9534
11	3391	13566	20.7835
11	3392	5615	10.6111
11	3393	6920	4.26393
11	3430	12158	13.001
12	3467	7155	23.522
12	3468	6836	22.424
12	3469	9311	35.6123
12	3470	6130	29.6127
12	3490	7692	31.0452
12	3491	2991	23.8736
12	3492	9016	27.6694
12	3493	2099	26.9158
12	3494	8909	1.66735
12	3495	2881	6.93011
12	3496	2610	6.8619
12	3497	5182	18.8739
12	3498	1698	38.0947
12	3499	2222	11.928
12	3500	6775	39.8936
12	3501	6040	17.8666
12	3502	10026	17.2897
12	3503	5991	17.5484
12	3504	7298	18.7995
12	3505	7071	13.9538
12	3506	4791	26.7898
12	3507	6709	10.6128
12	3508	5634	24.3674
12	3509	3170	27.8789
12	3510	4226	14.9295
12	3511	3837	6.76781
12	3512	5439	2.01821
12	3513	7702	30.7939
12	3514	8775	25.5994
12	3515	3886	22.3404
12	3516	1690	32.8751
12	3531	484	30.5194
12	3532	720	13.0028
12	3533	2880	18.6363
12	3534	3602	11.9176
12	3535	685	24.7341
12	3536	1310	19.9862
12	3537	1451	17.8875
12	3538	939	14.4922
12	3539	284	12.7192
12	3540	1527	1.28143
12	3541	4074	30.0192
12	3542	2548	21.055
12	3543	1370	6.82752
12	3544	2346	5.09086
12	3545	1855	11.099
12	3546	3462	5.57637
12	3547	201	7.33594
12	3548	3108	8.62875
12	3569	853	14.1509
13	3570	2163	31.4092
13	3571	939	23.9706
13	3572	2824	18.4496
13	3573	5297	27.0557
13	3574	3241	9.52528
13	3575	1400	27.2046
13	3576	5531	27.8684
13	3577	2577	31.1894
13	3578	1465	18.0924
13	3579	1440	5.7354
13	3580	4503	18.6388
13	3581	3421	22.8261
13	3582	4187	6.47248
13	3583	3542	13.8379
13	3584	5015	8.32099
13	3585	5193	4.74316
13	3609	1892	24.2334
13	3610	768	32.8619
13	3611	2456	20.3201
13	3612	4811	13.1854
13	3613	1835	30.4501
13	3614	636	19.5468
13	3615	2444	29.8305
13	3616	1629	21.3634
13	3617	450	11.0082
13	3618	1297	30.8579
13	3619	2610	25.4612
13	3620	1938	26.3612
13	3621	2250	22.7023
13	3622	1440	31.0553
13	3623	3276	27.0544
13	3624	2952	18.7928
13	3625	180	3.32651
13	3626	1083	14.5641
13	3627	814	26.5709
13	3628	1098	9.90991
13	3629	3304	25.6072
13	3630	926	12.4405
13	3631	5595	6.00331
13	3632	4130	33.2762
13	3642	6321	26.9309
13	3643	6090	4.69279
13	3644	742	16.6909
13	3645	1083	22.0628
13	3646	3204	22.5158
13	3647	2101	23.8997
13	3648	4970	16.1992
13	3649	3510	22.8497
13	3650	1719	20.9572
13	3651	540	18.1299
14	3675	9702	9.48943
14	3676	4649	19.8144
14	3677	324	0.77422
14	3678	4431	12.1211
14	3679	3673	25.759
14	3680	2012	23.5172
14	3681	603	0.701094
14	3682	990	20.7045
14	3683	458	0.451462
14	3684	6989	14.9218
14	3685	1288	23.5994
14	3686	127	0.218995
14	3687	127	0.941852
14	3688	10360	28.7032
14	3689	90	0.701094
14	3690	939	0.547473
14	3691	10219	7.12821
14	3692	2222	24.0468
14	3716	7977	9.65294
14	3717	2753	28.0693
14	3718	0	1.03867
14	3719	648	0.77422
14	3720	5588	8.05962
14	3721	484	3.2631
14	3722	2610	23.0476
14	3723	450	0.244843
14	3724	1200	0.638451
14	3725	4590	18.9583
14	3726	3560	24.6236
14	3727	5490	16.4026
14	3728	402	0.32849
14	3729	2160	28.756
14	3730	2163	27.8602
14	3731	3180	33.8952
14	3732	3427	32.0459
14	3733	1540	0.833853
14	3734	5136	26.2696
14	3735	6262	19.493
14	3736	180	0.991447
14	3737	5946	13.3322
14	3738	3061	7.6296
14	3739	4395	25.0149
14	3742	7997	16.4157
14	3743	1263	17.9282
14	3744	2616	30.443
14	3745	853	27.3959
14	3746	890	20.9608
14	3747	1892	34.1625
14	3748	7705	20.8865
14	3749	2803	29.4036
15	3750	5490	28.4572
15	3751	6420	36.1981
15	3752	5683	17.7888
15	3753	4800	26.0057
15	3793	9297	30.5267
15	3794	7825	20.414
15	3795	4269	34.5205
15	3796	2521	27.7141
15	3797	12610	35.7832
15	3798	3151	24.818
15	3799	3226	7.39803
15	3800	6466	33.8031
15	3801	1793	3.1947
15	3802	9549	28.4913
15	3803	5615	13.722
15	3804	9920	34.4554
15	3805	3694	18.1732
15	3806	10673	18.546
15	3807	7137	27.0171
15	3808	5391	20.4226
15	3809	3402	18.1907
15	3810	7521	17.8754
15	3811	1926	28.2898
15	3812	569	31.0088
15	3813	12101	8.18749
15	3814	1170	0.309704
15	3920	1049	0.244843
15	3921	2772	28.4388
15	3922	4122	32.5462
15	3923	201	0.394794
15	3924	973	26.561
15	3925	1938	34.2164
15	3926	4500	1.14304
15	3927	1497	24.9174
15	3928	7003	17.925
15	3929	1260	8.36778
15	3930	990	29.1406
15	3931	1530	19.648
15	3932	2322	21.6209
15	3933	6496	33.2933
15	3934	2291	1.67094
15	3935	3644	23.7633
15	3936	3505	13.8331
15	3937	1250	3.41677
15	3938	2071	2.8383
15	3939	450	0.734494
15	3940	284	17.8854
15	3941	270	28.0804
15	4089	0	0.589644
15	4090	849	1.1272
16	3815	6725	11.6162
16	3816	4540	13.8794
16	3817	2436	4.4053
16	3818	4898	5.5423
16	3942	8631	22.9324
16	3943	3961	15.7757
16	3944	10263	35.8766
16	3945	4718	17.1335
16	3946	636	32.8194
16	3947	11431	34.189
16	3948	6570	13.2614
16	3949	10009	11.1732
16	3950	6721	21.6682
16	3951	5236	19.6446
16	3952	9813	7.40199
16	3953	2070	11.2737
16	3954	5111	4.49219
16	3955	7342	4.74316
16	3956	7388	17.7051
16	3957	6835	20.9972
16	3958	5991	10.8193
16	3959	2540	35.5867
16	3960	3985	27.3365
16	3961	6840	16.4617
16	3962	6845	9.9742
16	3963	8759	20.8844
16	3964	1442	13.2074
16	3965	1006	2.25619
16	4091	3402	26.8452
16	4092	6641	26.7407
16	4093	648	1.97322
16	4094	1207	20.828
16	4095	1049	18.5665
16	4096	1145	9.28926
16	4097	9539	13.5098
16	4098	2646	32.3385
16	4099	4843	22.8158
16	4100	3271	11.6162
16	4101	6310	30.7339
16	4102	3886	13.1502
16	4103	2707	25.5175
16	4104	3103	27.7554
16	4105	1350	32.6878
16	4106	3222	20.9066
16	4107	1508	25.1208
16	4108	6280	9.81822
16	4109	2665	9.5174
16	4110	2795	26.2921
16	4111	5282	10.7568
16	4218	8260	31.5041
17	3819	3251	29.1913
17	3820	8667	25.1849
17	3821	2611	22.8041
17	3822	1772	6.11733
17	3966	4418	18.2194
17	3967	890	24.9515
17	3968	1909	28.6347
17	3969	6390	16.4935
17	3970	2396	28.1481
17	3971	3505	30.3223
17	3972	2178	36.8353
17	3973	1006	15.6156
17	3974	4503	31.8447
17	3975	4069	33.4923
17	3976	3832	17.871
17	3977	5839	11.8059
17	3978	2577	27.9958
17	3979	1087	0.558314
17	3980	127	11.5057
17	3981	4529	22.1175
17	3982	768	8.30487
17	3983	603	0.218995
17	3984	6701	19.5633
17	3985	1026	7.54547
17	3986	4009	24.6288
17	3987	3654	29.4154
17	3988	3003	31.3341
17	4112	5236	30.147
17	4113	6488	20.1502
17	4114	5418	13.3819
17	4115	6868	18.7959
17	4116	6046	27.0909
17	4117	4633	31.1205
17	4118	4633	20.4719
17	4120	3699	16.6013
17	4121	1898	19.5303
17	4122	956	26.2674
17	4123	4320	16.4323
17	4124	2077	42.4162
17	4125	4440	5.42021
17	4126	4860	15.7993
17	4127	4175	21.0558
17	4128	4412	27.1336
17	4129	1361	22.1955
17	4130	3628	18.3166
17	4131	6883	14.8102
17	4132	3819	33.4555
17	4133	1453	14.1529
17	4134	2671	23.21
18	3823	7102	21.6648
18	3824	10786	25.6823
18	3825	9144	15.2175
18	3826	11523	24.0359
18	3827	8851	13.4912
18	3828	10137	12.8128
18	3829	10561	23.4554
18	3989	1892	0.855143
18	3990	9819	17.1084
18	3991	4329	10.4649
18	3992	2930	0.109498
18	3993	5799	0.558314
18	3994	603	1.14304
18	3995	4782	0.244843
18	3996	3818	0.394794
18	3997	956	0.589644
18	3998	2813	0.346259
18	3999	1173	0.218995
18	4000	7688	0.451462
18	4001	127	0.32849
18	4002	4343	0.547473
18	4003	685	0.154853
18	4004	5889	28.1689
18	4005	1527	18.8753
18	4006	2052	0.346259
18	4007	4395	1.79531
18	4008	5181	3.10946
18	4135	4269	9.05944
18	4136	7009	0.77422
18	4137	2791	3.77024
18	4138	4792	29.8523
18	4139	5982	15.6734
18	4140	8037	16.7819
18	4141	6072	6.40013
18	4142	8102	28.589
18	4143	2191	13.741
18	4144	7605	1.78192
18	4145	1822	0.935468
18	4146	1183	24.5388
18	4147	2294	20.7878
18	4148	1200	11.431
18	4149	6199	21.1454
18	4150	5155	28.2789
18	4151	6868	13.8527
18	4152	5199	0.855143
18	4153	201	7.06864
18	4154	1609	11.8304
18	4155	4715	17.6102
18	4156	4202	6.96311
18	4157	2634	10.3103
19	4219	5411	1.35416
19	4220	15501	5.06633
19	4221	7205	21.2299
19	4222	3170	23.0278
19	4223	11527	21.2299
19	4224	4952	13.1702
19	4225	6048	2.15584
19	4226	7928	1.09485
19	4227	16008	18.5329
19	4228	1892	0.309704
19	4229	10265	5.36749
19	4230	12560	0.734494
19	4231	8338	20.834
19	4232	3494	19.9628
19	4233	11196	0.451462
19	4234	13032	12.8364
19	4235	7256	11.9507
19	4236	9734	7.31593
19	4269	4783	32.9382
19	4270	484	5.72611
19	4271	2628	3.79074
19	4272	5652	23.7681
19	4273	5964	20.6394
19	4274	3150	10.5543
19	4275	2534	3.62349
19	4276	829	1.73079
19	4277	8027	19.9971
19	4278	4090	13.1166
19	4279	4278	15.0966
19	4280	969	26.4049
19	4281	1622	16.4626
19	4282	8498	22.7753
19	4283	1272	1.33635
19	4284	2030	8.33848
19	4285	1224	25.2302
19	4286	1659	20.9988
19	4287	1250	7.01692
19	4288	6575	29.8188
19	4289	324	1.81191
19	4290	4217	16.5716
19	4320	4834	18.8327
19	4321	4910	6.02492
19	4322	6877	15.133
19	4323	5762	8.45503
19	4324	4633	9.65832
19	4325	4590	18.0811
19	4326	4518	9.89421
19	4327	6689	12.6471
19	4328	6809	20.4861
19	4329	6037	12.8468
20	4237	16287	17.3832
20	4238	13954	11.6308
20	4239	23149	16.7172
20	4240	24913	12.0861
20	4241	16361	14.3598
20	4242	21809	4.79918
20	4243	18499	18.2615
20	4244	19282	5.15108
20	4245	20590	23.8427
20	4246	22334	12.4065
20	4247	14766	21.4373
20	4291	21215	16.2251
20	4292	13895	5.27056
20	4293	14679	16.672
20	4294	17336	14.8468
20	4295	16744	17.0489
20	4296	19291	0.437983
20	4297	15134	20.5357
20	4298	19472	4.05058
20	4299	15773	0.309704
20	4300	21130	24.5419
20	4301	17288	9.59536
20	4302	23138	16.5984
20	4303	19963	16.7028
20	4304	22774	17.6613
20	4305	22378	10.7302
20	4306	20509	3.56208
20	4307	12669	32.7297
20	4308	18300	10.5108
20	4309	12795	20.4807
20	4330	8317	13.6916
20	4331	10659	34.762
20	4332	13591	26.665
20	4333	10618	17.9528
20	4334	8356	14.9222
20	4335	4896	25.0068
20	4336	9714	29.2455
20	4337	15603	19.6074
20	4338	9360	10.2281
20	4339	12319	21.6557
20	4340	17626	1.10031
20	4341	11777	15.3031
20	4342	8996	17.4458
20	4343	15978	24.9324
20	4344	13262	15.6973
20	4345	16698	3.57044
20	4346	15027	10.3652
20	4347	16116	19.8229
20	4348	15146	24.5064
20	4349	10189	12.9012
21	4158	8820	31.4774
21	4159	1310	26.6052
21	4160	8207	28.1479
21	4161	9036	20.5504
21	4162	2250	22.4681
21	4163	6527	14.4975
21	4164	6319	12.8717
21	4165	5948	14.6779
21	4166	7448	22.3373
21	4167	4500	23.721
21	4168	8580	10.673
21	4169	4503	21.091
21	4170	9449	23.1852
21	4171	7902	3.67577
21	4172	5816	15.987
21	4173	3996	10.1825
21	4174	4413	9.58512
21	4175	7020	15.414
21	4176	3538	16.1903
21	4177	5771	5.52732
21	4178	7920	18.5149
21	4248	5606	23.5571
21	4249	1049	0.109498
21	4250	0	0
21	4251	1397	18.3015
21	4252	1982	15.661
21	4253	1707	16.2278
21	4254	1080	26.7016
21	4255	1800	6.87217
21	4256	1350	21.7764
21	4257	1288	15.5515
21	4258	0	0.437983
21	4259	324	23.5592
21	4260	3641	25.9953
21	4261	0	0.61939
21	4262	402	5.48538
21	4263	939	0.547473
21	4264	3319	19.675
21	4265	484	0.394794
21	4266	2362	16.0624
21	4310	2250	22.079
21	4311	1808	15.7245
21	4312	763	24.8072
21	4313	3150	17.8121
21	4314	3330	12.6755
21	4315	1772	25.6085
21	4316	2521	32.4269
21	4317	1942	42.601
21	4318	4582	26.7546
21	4319	1719	19.6477
22	3830	5987	24.5873
22	3831	1909	18.5202
22	3832	3964	39.5516
22	3833	1423	11.7439
22	3834	6237	7.94135
22	3835	4970	18.2649
22	4009	3415	12.1653
22	4010	7056	7.70593
22	4011	810	2.86345
22	4012	6502	11.9772
22	4013	10224	22.1797
22	4014	6384	15.9863
22	4015	9619	21.4301
22	4016	7130	29.9164
22	4017	8858	23.0573
22	4018	8101	11.3711
22	4019	5891	24.5183
22	4020	3520	2.97599
22	4021	10328	15.5292
22	4022	10429	25.0289
22	4023	5619	14.8811
22	4024	7727	21.1391
22	4025	2623	2.76146
22	4026	8122	5.15454
22	4027	4551	13.1808
22	4028	3961	10.227
22	4029	7020	4.31112
22	4030	7056	13.5538
22	4179	8370	22.9825
22	4180	10890	9.32408
22	4181	5391	16.1513
22	4182	5615	26.7051
22	4183	5495	26.9466
22	4184	7562	17.6012
22	4185	10118	17.9018
22	4186	12518	18.2137
22	4187	6584	29.4794
22	4188	9522	26.0063
22	4189	10085	29.4694
22	4190	11833	9.77408
22	4191	10681	20.3536
22	4192	10381	22.1638
22	4193	11163	21.9509
22	4194	6555	21.3922
22	4195	9742	23.0609
22	4196	7794	8.23083
22	4197	9347	21.2376
22	4198	9450	4.5748
22	4267	2299	28.2525
22	4268	1822	16.6399
23	3754	7314	15.0665
23	3755	10435	30.8914
23	3756	8338	29.637
23	3757	0	0.109498
23	3758	0	0.394794
23	3759	2880	9.10539
23	3760	904	9.33586
23	3761	1083	10.9328
23	3762	5743	13.4392
23	3763	9459	19.9841
23	3764	6290	25.0561
23	3765	7089	28.6264
23	3766	7254	23.6412
23	3767	814	17.2212
23	3836	3262	1.00942
23	3837	4965	7.99998
23	3838	8707	25.9223
23	3839	9761	8.15965
23	3840	1484	0.309704
23	3841	0	0
23	3842	6766	6.66969
23	3843	90	0.701094
23	3844	3996	19.5813
23	3845	7547	5.45832
23	3846	1373	0.701094
23	3847	3424	26.0927
23	3848	3018	29.183
23	3849	1719	19.224
23	3850	8166	1.35416
23	3851	8561	4.70291
23	3852	5313	3.81893
23	3853	2747	3.28135
23	3854	7871	17.0679
23	3855	0	0.451462
23	3856	7254	5.91406
23	3857	12341	4.49219
23	3858	5877	12.3934
23	3859	7309	1.55588
23	3860	8897	10.3414
23	3861	4807	20.7821
23	3862	2197	5.5455
23	3863	6681	16.6989
23	4031	14058	12.7926
23	4032	6251	11.7405
23	4033	10462	19.2004
23	4034	12727	9.2668
23	4035	14930	6.92671
23	4036	2898	15.1618
23	4037	12787	15.3404
23	4038	7731	13.5394
24	3768	1594	0.437983
24	3769	1170	1.14304
24	3770	1652	0.941852
24	3771	254	0.77422
24	3864	4670	1.17916
24	3865	1659	0.547473
24	3866	3671	10.7627
24	3867	10805	22.6184
24	3868	371	0.154853
24	3869	2795	5.59333
24	3870	3075	2.36745
24	3871	814	0.451462
24	3872	3107	10.5108
24	3873	4749	6.14333
24	3874	2495	1.53651
24	3875	9215	19.675
24	3876	7371	0.985384
24	3877	1408	0.309704
24	3878	3406	3.607
24	3879	180	12.4676
24	3880	402	0.244843
24	3881	5092	8.91681
24	3882	4058	3.21705
24	3883	1772	1.00942
24	3884	3449	2.03592
24	3885	5603	7.84211
24	4039	8658	18.7675
24	4040	5998	25.4832
24	4041	2948	25.0576
24	4042	5760	8.67646
24	4043	2012	14.3644
24	4044	10502	1.46057
24	4045	5236	11.4145
24	4046	12638	12.1954
24	4047	9100	16.0294
24	4048	11918	13.7337
24	4049	11414	15.645
24	4050	3693	13.9622
24	4051	4870	19.5612
24	4052	6927	6.53139
24	4053	10956	13.2209
24	4054	5186	11.8871
24	4055	1453	14.1228
24	4056	6723	20.7828
24	4057	9125	19.6529
24	4058	973	12.3492
24	4059	6555	8.30697
24	4060	2930	18.7432
24	4199	8536	23.0077
24	4200	8662	28.0946
25	3886	9869	4.3304
25	3887	7205	0.451462
25	3888	6698	14.2616
25	3889	7491	6.03471
25	3890	2222	18.8003
25	3891	10435	18.5034
25	3892	10373	9.41482
25	3893	5850	1.42738
25	3894	1690	31.2215
25	3895	4978	4.78803
25	3896	8483	12.3556
25	3897	11132	4.24435
25	3898	5721	0.77422
25	4061	4202	18.1677
25	4062	3956	13.903
25	4063	10505	23.7178
25	4064	5437	1.76843
25	4065	9535	8.62807
25	4066	1879	18.3385
25	4067	7446	10.2298
25	4068	10843	0.437983
25	4069	180	2.67125
25	4070	1006	0.394794
25	4071	5933	20.3774
25	4072	9458	21.422
25	4073	4810	3.18909
25	4074	1170	17.7589
25	4075	6480	1.97322
25	4076	1622	13.611
25	4077	4810	16.6992
25	4078	6788	5.76318
25	4079	2930	10.4138
25	4080	7547	27.0844
25	4201	2595	14.798
25	4202	127	15.9731
25	4203	1006	13.1757
25	4204	1083	21.4393
25	4205	2176	14.3079
25	4206	2418	29.8955
25	4207	1260	0.547473
25	4208	926	29.4047
25	4209	5670	28.8807
25	4210	1938	1.86081
25	4211	5521	1.97322
25	4212	1465	8.62875
25	4213	0	0.109498
25	4214	5490	21.9848
25	4215	6430	29.4036
25	4216	90	0.437983
25	4217	284	0.451462
26	3772	5580	11.1976
26	3773	6562	16.9412
26	3774	6516	4.5644
26	3775	774	4.75941
26	3776	5351	27.3398
26	3777	6948	19.0103
26	3778	2305	0.941852
26	3779	4723	17.1062
26	3780	8371	13.1077
26	3781	7633	21.6355
26	3782	2737	4.5631
26	3783	804	1.9488
26	3784	7780	17.0489
26	3785	2101	5.46266
26	3786	1731	12.6502
26	3787	3421	11.3024
26	3788	4413	13.5644
26	3789	8239	13.875
26	3790	1210	2.30082
26	3791	7184	15.8264
26	3792	8290	0.244843
26	3899	4236	8.89987
26	3900	2577	11.2595
26	3901	5537	14.5214
26	3902	8822	13.8746
26	3903	3449	12.2014
26	3904	90	1.00942
26	3905	1659	22.7722
26	3906	3330	25.084
26	3907	2520	15.142
26	3908	1532	0.154853
26	3909	3961	12.5937
26	3910	886	1.46875
26	3911	3330	2.55456
26	3912	8104	15.919
26	3913	5447	18.9182
26	3914	576	1.28143
26	3915	4626	10.7307
26	3916	381	0.76644
26	3917	1872	19.3064
26	3918	1923	14.7851
26	3919	6443	12.8333
26	4082	742	1.00942
26	4083	0	0.394794
26	4084	450	0.547473
26	4085	3438	17.9691
26	4086	1279	2.2322
26	4087	4802	12.0632
26	4088	450	0.875915
27	3633	7326	1.46057
27	3634	9257	24.6718
27	3652	540	1.00942
27	3653	7365	13.0376
27	3654	7089	3.08246
27	3655	2646	12.6502
27	3656	7448	13.7543
27	3657	2826	2.20252
27	3658	9940	2.49536
27	3659	4468	24.1036
27	3660	3964	2.51921
27	3661	5867	2.25619
27	3662	7618	6.17209
27	3663	7227	11.1773
27	3664	10989	6.72069
27	3665	7674	15.7554
27	3666	9164	0.61939
27	3667	6944	7.88004
27	3668	9910	16.6039
27	3669	6718	3.81893
27	3670	6889	3.52166
27	3671	725	2.10244
27	3672	6168	2.60095
27	3673	4715	19.1521
27	3674	7301	12.3897
27	3693	5601	6.96311
27	3694	0	0.451462
27	3695	0	0.32849
27	3696	4053	4.16222
27	3697	939	5.3719
27	3698	0	2.41002
27	3699	1170	2.0564
27	3700	284	0.902868
27	3701	2675	3.94177
27	3702	127	2.3395
27	3703	4950	7.24096
27	3704	0	1.3183
27	3705	0	1.09485
27	3706	2436	0.77422
27	3707	90	1.28143
27	3708	7046	18.1065
27	3709	524	1.03289
27	3710	1775	20.1499
27	3711	1853	0.109498
27	3712	5247	22.5018
27	3713	1183	4.21903
27	3714	3664	11.7405
27	3715	509	1.14304
27	3740	5771	0.244843
27	3741	6251	25.6255
28	3549	7191	4.00325
28	3550	6205	0.244843
28	3551	7848	11.2923
28	3552	5291	15.2078
28	3553	990	4.42013
28	3554	1609	7.42097
28	3555	6436	14.535
28	3556	2101	0.394794
28	3557	720	0.882731
28	3558	8700	19.1314
28	3559	1835	0.692492
28	3560	6868	5.66691
28	3561	4522	13.1434
28	3562	7616	29.9719
28	3563	11345	17.7019
28	3564	3953	3.47391
28	3565	11122	21.8721
28	3566	13799	10.927
28	3567	6174	8.04148
28	3568	8012	6.71543
28	3586	969	0.929039
28	3587	576	0.941852
28	3588	4716	0.979284
28	3589	5762	0.309704
28	3590	6118	3.71931
28	3591	1207	17.0664
28	3592	3961	1.00942
28	3593	9354	14.2035
28	3594	8730	0.32849
28	3595	3192	2.15584
28	3596	3994	0.76644
28	3597	1855	0.833853
28	3598	10381	2.41745
28	3599	3231	0.218995
28	3600	324	0.547473
28	3601	6300	1.14304
28	3602	956	0.882731
28	3603	10803	13.4789
28	3604	13634	3.48933
28	3605	12337	9.35567
28	3606	10144	8.69787
28	3607	3745	0.394794
28	3608	4140	0.451462
28	3635	1654	0.218995
28	3636	1571	1.87044
28	3637	1026	11.5176
28	3638	3334	1.11652
28	3639	547	0.547473
28	3640	0	0.489678
28	3641	402	0.76644
29	3431	10412	18.7002
29	3432	12203	20.8424
29	3433	3690	27.9824
29	3434	5490	16.0176
29	3435	5554	9.09074
29	3436	8146	9.44241
29	3437	8767	24.5669
29	3438	12371	10.1457
29	3439	6365	19.1198
29	3440	10375	1.38478
29	3441	12125	16.0365
29	3442	10948	13.7086
29	3443	7259	24.2844
29	3444	11471	9.8744
29	3445	8172	20.5744
29	3446	9273	23.3601
29	3447	11161	10.9812
29	3471	2980	5.94495
29	3472	10867	0.244843
29	3473	8191	16.5198
29	3474	8651	10.9812
29	3475	10643	0
29	3476	4755	14.3506
29	3477	14157	6.20071
29	3478	8100	8.8436
29	3479	10182	8.44262
29	3480	14490	14.2147
29	3481	19710	1.86402
29	3482	10449	2.74192
29	3483	6110	14.0274
29	3484	14453	6.14813
29	3485	15450	1.40198
29	3486	12446	8.40529
29	3487	8058	11.099
29	3488	1642	11.8895
29	3489	969	3.17408
29	3517	5124	2.98601
29	3518	3226	1.62737
29	3519	3360	1.5788
29	3520	4104	10.5755
29	3521	10685	0.309704
29	3522	6854	1.7134
29	3523	4910	0.66602
29	3524	2401	3.62349
29	3525	4765	0.61939
29	3526	8724	1.93648
29	3527	4878	4.18362
29	3528	1731	1.91472
29	3529	3641	1.99734
29	3530	2489	1.37174
30	3328	7965	28.8296
30	3329	6924	16.6026
30	3330	6320	17.9566
30	3331	7380	8.17465
30	3332	4957	16.1062
30	3333	7286	33.4599
30	3334	3276	4.04616
30	3335	7501	24.4439
30	3336	5047	25.7748
30	3337	1006	14.7044
30	3338	4952	32.2151
30	3339	5316	26.2578
30	3340	6624	26.0714
30	3341	4889	1.53651
30	3342	2818	5.91706
30	3394	5948	11.6318
30	3395	1909	17.6598
30	3396	9025	22.0257
30	3397	201	0.77422
30	3398	0	0
30	3399	7656	17.8077
30	3400	814	1.0783
30	3401	2646	2.70239
30	3402	1548	1.14304
30	3403	0	0
30	3404	3320	11.3084
30	3405	0	0
30	3406	0	0
30	3407	1946	20.5104
30	3408	7504	29.3375
30	3409	2500	2.36745
30	3410	0	0
30	3448	3309	11.0862
30	3449	6465	8.36081
30	3450	371	0.797106
30	3451	2858	8.23083
30	3452	4514	4.06672
30	3453	4074	0.61939
30	3454	5860	6.93011
30	3455	4327	4.08425
30	3456	1080	0.985384
30	3457	768	2.01227
30	3458	576	1.33186
30	3459	5840	7.5811
30	3460	6673	0.558314
30	3461	3457	3.33368
30	3462	4069	9.9961
30	3463	5762	1.75484
30	3464	1942	17.8012
30	3465	458	1.52084
31	3262	10437	12.9233
31	3263	4870	14.2519
31	3264	10546	18.7915
31	3265	5358	27.6868
31	3266	16507	19.7433
31	3267	9023	20.4611
31	3268	14240	16.7028
31	3269	19011	6.56468
31	3270	12705	12.5485
31	3271	18716	14.7409
31	3343	6346	19.6602
31	3344	1489	0.882731
31	3345	14125	19.0293
31	3346	1026	0.991447
31	3347	20303	13.5098
31	3348	14490	4.25695
31	3349	5580	2.07667
31	3350	20161	28.23
31	3351	1540	1.86081
31	3352	12268	17.4166
31	3353	12754	9.03893
31	3354	7692	7.42097
31	3355	201	0.244843
31	3356	1297	0.656959
31	3357	8370	19.5156
31	3358	636	0.855143
31	3359	4313	2.89045
31	3360	16001	17.9566
31	3361	16203	4.45764
31	3362	8629	5.25253
31	3411	9545	13.3585
31	3412	3542	4.7394
31	3413	6720	15.0386
31	3414	4540	4.59037
31	3415	7801	1.33635
31	3416	0	0
31	3417	11310	3.39751
31	3418	6833	0.77422
31	3419	360	6.50518
31	3420	4508	5.51982
31	3421	10345	4.17365
31	3422	2167	5.11527
31	3423	6653	1.14304
31	3424	18341	1.46875
31	3425	0	0
31	3426	8026	20.18
31	3427	450	3.91143
31	3428	10085	7.78824
31	3429	12904	1.7099
31	3466	5318	2.06511
32	3207	12229	24.6532
32	3208	8797	1.52084
32	3209	13540	23.6781
32	3210	13633	15.8918
32	3211	9727	1.87363
32	3212	11490	28.1858
32	3213	11531	28.356
32	3214	10209	14.7021
32	3215	10070	22.0858
32	3216	10245	3.25211
32	3217	7838	2.48094
32	3218	8052	27.5715
32	3219	12924	7.38057
32	3220	10572	28.6447
32	3222	15286	2.2773
32	3272	1297	2.61013
32	3273	12163	3.08052
32	3274	7838	0.489678
32	3275	9102	0.309704
32	3276	4218	0.882731
32	3277	12235	0.882731
32	3278	4844	0.77422
32	3279	8233	25.2095
32	3280	8996	0.66602
32	3281	8292	26.2791
32	3282	90	0.346259
32	3283	3081	15.9325
32	3284	9526	23.6364
32	3285	8528	1.38478
32	3286	5149	1.69937
32	3287	1049	3.31032
32	3288	2700	5.8558
32	3289	6125	6.10573
32	3290	10211	3.635
32	3291	5436	2.1998
32	3292	10088	4.92617
32	3293	7448	0.734494
32	3294	6658	8.05382
32	3363	1094	0.489678
32	3364	2423	3.97937
32	3365	0	0
32	3366	0	0
32	3367	0	0
32	3368	1712	0.66602
32	3369	0	0
32	3370	2864	2.91309
32	3371	0	3.13432
32	3372	1138	3.08826
32	3373	1808	1.52477
33	3125	12672	24.6215
33	3126	11084	21.8682
33	3127	19072	1.42738
33	3128	16061	4.58648
33	3129	18796	3.78917
33	3130	17373	2.94572
33	3131	7470	11.7958
33	3132	22380	1.24827
33	3133	19966	8.90705
33	3134	7137	19.7053
33	3135	10359	11.5628
33	3161	16032	1.33186
33	3162	25710	5.46266
33	3163	6569	14.1618
33	3164	21142	3.84072
33	3165	12580	5.97668
33	3166	23635	12.9134
33	3167	27216	5.21515
33	3168	13729	3.39575
33	3169	10710	3.39223
33	3170	20111	2.68241
33	3171	25950	1.54816
33	3172	19984	0.309704
33	3173	6520	29.0238
33	3174	22815	13.0243
33	3175	18234	1.46875
33	3176	16751	1.91472
33	3177	25687	11.1971
33	3178	7066	24.403
33	3179	12851	1.0783
33	3180	22999	9.57186
33	3181	17247	1.18423
33	3182	12373	6.55929
33	3183	9545	12.1346
33	3184	14985	2.95585
33	3223	7618	7.33594
33	3224	12722	0.77422
33	3225	13806	0.558314
33	3226	5353	5.28628
33	3227	9125	0.701094
33	3228	20306	9.44976
33	3229	7393	6.72944
33	3230	8967	7.37024
33	3231	8670	1.11652
33	3232	14694	1.86402
33	3233	9361	1.17916
33	3234	15631	4.55919
33	3235	12896	2.87178
33	3236	9180	0.875915
33	3237	12780	1.03289
34	2567	11006	0.46455
34	2568	14287	24.9832
34	2569	10190	3.74008
34	2570	6100	8.69854
34	2759	4900	20.1758
34	2760	11562	5.04873
34	2761	270	1.53651
34	2762	7237	14.9222
34	2763	10764	23.9273
34	2764	3424	11.162
34	2765	12206	10.405
34	2766	8493	6.61384
34	2767	7945	22.3797
34	2768	3944	6.44785
34	2769	13991	27.0622
34	2770	10734	6.98755
34	2771	2070	0.77422
34	2772	2779	12.473
34	2773	2423	0.855143
34	2774	15312	6.31106
34	2775	14413	10.3652
34	2776	5896	1.81191
34	2777	7191	19.6721
34	2778	7830	16.3633
34	2992	14453	3.43245
34	2993	8060	15.8345
34	2994	7700	10.0741
34	2995	5322	1.35416
34	2996	19749	2.32153
34	2997	12512	9.22359
34	2998	14043	20.2987
34	2999	11345	4.80289
34	3000	16299	20.3141
34	3001	3528	4.51332
34	3002	9965	2.15584
34	3003	21330	20.6638
34	3004	5994	2.30082
34	3005	13043	17.1161
34	3006	11500	14.8855
34	3007	13184	4.84842
34	3008	17883	3.97338
34	3009	12620	10.337
34	3010	15673	8.55835
34	3011	12164	20.6589
34	3012	16838	6.6926
34	3013	11674	10.8325
34	3014	3953	5.53375
34	3136	19955	0.692492
34	3137	18166	8.87309
34	3138	18162	4.25275
35	2154	18154	13.0461
35	2155	19091	4.42819
35	2156	14338	18.9466
35	2157	10117	4.85087
35	2158	15663	6.54311
35	2159	20721	13.8942
35	2160	16112	10.6596
35	2161	20567	0.935468
35	2162	20036	7.91851
35	2163	15082	12.6289
35	2164	20128	2.88838
35	2165	16946	36.0144
35	2166	15444	6.32506
35	2167	21859	2.12509
35	2168	17678	18.6988
35	2169	19982	3.79545
35	2170	13894	20.8037
35	2171	14850	12.0149
35	2172	13874	15.1056
35	2173	15698	26.0601
35	2304	24975	0.902868
35	2305	26660	6.56378
35	2306	22151	1.54816
35	2307	26130	19.183
35	2308	27017	0.346259
35	2309	22631	18.9635
35	2310	27890	2.07955
35	2311	21584	1.31374
35	2312	23038	2.18068
35	2313	23069	1.24827
35	2314	26220	23.632
35	2315	21205	14.6932
35	2316	24187	0.589644
35	2317	28906	10.7307
35	2318	26155	12.6657
35	2319	19902	1.75484
35	2320	20972	1.66735
35	2321	22570	0.77422
35	2322	18466	2.36745
35	2323	22745	24.2967
35	2324	24493	0.109498
35	2410	32240	11.8795
35	2411	26987	3.66765
35	2412	30827	3.36929
35	2413	30552	17.8439
35	2414	30484	32.5355
35	2415	31637	12.3897
35	2416	32832	7.57491
35	2417	31966	18.3961
35	2418	31159	8.17608
36	1218	14996	6.43687
36	1219	14796	28.1128
36	1220	18235	13.3385
36	1221	13191	17.8118
36	1222	13954	5.30083
36	1223	17079	12.4423
36	1224	18782	2.73537
36	1225	14328	11.523
36	1302	4164	9.81822
36	1303	6363	7.45564
36	1304	702	7.78749
36	1305	3614	13.452
36	1306	10075	22.3404
36	1307	8082	20.8109
36	1308	6687	2.80441
36	1309	11412	3.94932
36	1310	8424	3.50128
36	1311	3703	11.6528
36	1312	3664	32.2341
36	1313	11525	25.0596
36	1314	4519	14.6569
36	1315	5047	6.50518
36	1316	12749	20.427
36	1317	10246	8.38795
36	1318	2228	13.2433
36	1319	5040	4.0329
36	1320	9118	28.5155
36	1321	6480	6.174
36	1322	12320	5.76626
36	1323	8102	22.077
36	1324	3155	3.17971
36	1325	7814	20.2987
36	1326	9456	7.06448
36	1327	5948	3.85156
36	1328	4072	14.8825
36	1329	2222	2.0564
36	1380	1288	0.855143
36	1381	853	0.547473
36	1382	1080	0.346259
36	1383	6262	5.74365
36	1384	0	0.437983
36	1385	763	1.86081
36	1386	1855	0.692492
36	1387	8284	1.52477
36	1388	4843	0.547473
36	1389	3693	0.346259
36	1390	0	0.46455
36	1391	0	0.558314
36	1392	2938	0.489678
36	1393	4187	0.109498
37	777	11981	21.9968
37	778	15084	26.8896
37	779	4069	18.2194
37	780	11023	1.17916
37	781	6649	15.2618
37	782	14013	26.7784
37	783	11966	2.86345
37	784	8935	16.3996
37	785	15911	22.3893
37	786	9623	3.48077
37	787	7872	31.2609
37	788	13180	1.46057
37	877	3505	13.7337
37	878	8731	31.886
37	879	15533	24.3017
37	880	2942	27.5114
37	881	16828	19.5946
37	882	19338	22.1504
37	883	8797	14.5622
37	884	19032	10.6327
37	885	7237	27.0654
37	886	14700	7.8354
37	887	18476	30.9011
37	888	17629	24.4643
37	889	2705	20.177
37	890	13733	1.1272
37	891	4526	29.7445
37	892	1083	31.4511
37	893	19738	15.4242
37	894	15262	3.28861
37	895	720	21.2442
37	896	11515	13.0208
37	897	12810	3.78917
37	898	8400	9.32097
37	899	3924	33.8045
37	985	16142	23.5606
37	986	8405	24.8595
37	987	12804	7.7506
37	988	16349	0.109498
37	989	13672	21.2131
37	990	14071	2.41002
37	991	10375	6.82666
37	992	16195	16.3387
37	993	6842	18.6711
37	994	13864	6.00921
37	995	16083	7.51903
37	996	12983	5.11874
37	997	12048	1.5939
37	998	12096	13.1349
37	999	15503	1.39341
38	516	5298	2.853
38	517	5180	1.5939
38	518	0	0
38	519	720	2.17243
38	520	0	0
38	521	0	0
38	572	5526	6.89183
38	573	3600	4.94901
38	574	8443	10.5201
38	575	90	1.43992
38	576	9229	5.5166
38	577	0	0
38	578	2052	3.54193
38	579	0	0
38	580	8709	16.059
38	581	2595	1.00942
38	582	9365	17.8239
38	583	0	1.22404
38	584	1659	11.2519
38	585	8282	2.74409
38	586	4735	1.88954
38	587	4065	8.39281
38	588	4013	0.547473
38	589	4183	12.0088
38	590	7543	7.4831
38	591	3457	11.5412
38	592	3330	12.7637
38	593	0	2.25619
38	594	4917	11.9545
38	595	0	0
38	596	3474	14.2813
38	597	90	6.7408
38	598	4344	9.12827
38	599	7110	11.6484
38	636	11973	23.0573
38	637	14961	1.73079
38	638	13440	26.1607
38	639	7470	8.08493
38	640	12763	11.9748
38	641	14726	26.7581
38	642	13241	14.6779
38	643	13320	20.655
38	644	9680	23.4984
38	645	10152	15.1301
38	646	11615	15.661
38	647	14088	16.2062
38	648	8987	29.2642
38	649	11635	5.71059
38	650	14658	3.30671
38	651	12339	15.4693
39	600	2012	11.7207
39	601	9360	20.3892
39	602	6915	11.4444
39	603	371	1.80529
39	604	7272	35.1039
39	605	0	0
39	652	4347	1.86081
39	653	4898	2.80441
39	654	900	1.56738
39	655	484	2.46886
39	656	4963	0.991447
39	657	4365	0.789551
39	658	2226	1.17916
39	659	6641	29.6492
39	660	4519	3.41677
39	661	4680	1.42738
39	662	4275	2.93557
39	663	3295	1.00942
39	664	0	1.00942
39	665	3056	4.15506
39	666	6050	8.62875
39	667	7759	7.01441
39	668	4379	1.46057
39	691	3759	7.06864
39	692	6354	22.6253
39	693	4959	2.70239
39	694	3474	10.2163
39	695	8607	8.44607
39	696	7029	13.3155
39	697	5950	15.6489
39	698	7066	8.32309
39	699	1527	14.4823
39	700	284	4.0092
39	701	1775	10.6424
39	702	5418	23.5107
39	703	7238	1.93648
39	704	7798	23.1825
39	705	1786	1.9823
39	706	2099	5.5583
39	707	1080	5.88199
39	708	6152	5.13378
39	709	1698	1.78192
39	710	3444	13.056
39	711	1681	3.08826
39	712	5777	6.86618
39	713	3844	5.56787
39	714	7353	10.7158
39	715	5330	2.32668
39	716	7365	0.61939
39	717	2456	15.6848
40	669	4860	2.73537
40	670	8951	25.0449
[truncated: 2,343 more rows]
