# Supplementary material for: The Tibetan Antelope Population Depends on Lakes on the Tibetan Plateau
Source: Animals (Basel). 2023 Nov 22;13(23):3614. doi: 10.3390/ani13233614 (PMC10705376; doi:10.3390/ani13233614)
Supplement: Supplementary file 1 [file animals-13-03614-s001.zip › Table S2 Relationship between individual numbers of Tibetan antelope and lake area.xlsx]

## Sheet: species1
sample	species	lake area (km2)	quantity
49	Tibetan antelope	0.235273	3
50	Tibetan antelope	0.399868	16
51	Tibetan antelope	2.8081	1
54	Tibetan antelope	266.245	33
55	Tibetan antelope	41.3081	37
58	Tibetan antelope	38.2024	6
59	Tibetan antelope	75.0903	4
61	Tibetan antelope	26.7889	3
63	Tibetan antelope	166.361	64
79	Tibetan antelope	15.3045	2
80	Tibetan antelope	9.47146	15
81	Tibetan antelope	13.0395	30
82	Tibetan antelope	100.691	8
83	Tibetan antelope	5.16301	6
