# Supplementary material for: The Tibetan Antelope Population Depends on Lakes on the Tibetan Plateau
Source: Animals (Basel). 2023 Nov 22;13(23):3614. doi: 10.3390/ani13233614 (PMC10705376; doi:10.3390/ani13233614)
Supplement: Supplementary file 1 [file animals-13-03614-s001.zip › Table S3 Vegetation sample data.xls]

## Sheet: Analytical table
			Distance gradient	100m		500m		1km		3km		5km		10km
Lakes	Freshwater/saltwater lakes	Lake area（km2）		Average vegetation cover	Average plant species	Average vegetation cover	Average plant species	Average vegetation cover	Average plant species	Average vegetation cover	Average plant species	Average vegetation cover	Average plant species	Average vegetation cover	Average plant species
1	Freshwater	412		0.816667	11.6667	0.683333	7.66667	0.633333	6	0.55	5.66667	0.433333	4	0.366667	4.66667
2	Freshwater	638		0.883333	13	0.85	13	0.716667	9	0.45	7.33333	0.433333	4.66667	0.166667	4.33333
3	Freshwater	526		0.783333	10.3333	0.716667	10.3333	0.733333	7.33333	0.65	7	0.633333	6.33333	0.55	6.66667
4	Freshwater	232.2		0.65	7.66667	0.566667	7	0.466667	8.33333	0.483333	6.33333	0.433333	5.33333	0.433333	6
5	Freshwater	486.6		0.616667	5	0.466667	5.33333	0.383333	3.33333	0.266667	4.33333	0.2	4.33333	0.216667	3.66667
6	Freshwater	300		0.866667	11.6667	0.85	10.3333	0.816667	9	0.7	7.66667	0.7	7.66667	0.566667	6.33333
7	Freshwater	54.5		0.666667	7.66667	0.6	10	0.483333	8	0.366667	8	0.166667	5.66667	0.233333	5.66667
8	Freshwater	50		0.9	12	0.9	10.6667	0.866667	11.3333	0.716667	9.66667	0.566667	7.66667	0.566667	7
9	Freshwater	295		0.683333	7.33333	0.633333	7.33333	0.583333	6	0.45	6	0.366667	6.66667	0.35	5.33333
10	Freshwater	37.5		0.866667	19.6667	0.8	19.3333	0.816667	14.6667	0.783333	12	0.733333	11.3333	0.683333	10
11	Saltwater	1961.5		0.466667	6	0.65	8	0.583333	7.66667	0.533333	5.66667	0.433333	5.66667	0.55	4.33333
12	Saltwater	996.9		0.366667	4.66667	0.6	5.66667	0.583333	6	0.516667	4	0.233333	4.33333	0.133333	4
13	Saltwater	638		0.816667	12.6667	0.75	13.6667	0.666667	11	0.633333	10	0.616667	8.33333	0.533333	7.66667
14	Saltwater	835.3		0.716667	6.66667	0.65	6.33333	0.533333	8	0.416667	7	0.183333	6.33333	0.15	6.66667
15	Saltwater	4625.6		0.833333	11.3333	0.65	11.3333	0.633333	10.6667	0.666667	8.33333	0.516667	9	0.516667	8.66667
16	Saltwater	512.7		0.65	11	0.516667	12.3333	0.466667	9.66667	0.316667	8.33333	0.233333	9	0.116667	6.66667
17	Saltwater	244.7		0.716667	9.66667	0.583333	9.33333	0.55	11	0.4	6.66667	0.25	7.33333	0.266667	5.33333
18	Saltwater	200		0.65	8.33333	0.583333	7.66667	0.6	9.33333	0.416667	7	0.183333	7	0.15	4.66667
19	Saltwater	461.5		0.55	6.33333	0.616667	7	0.483333	7.33333	0.316667	5.33333	0.316667	6	0.216667	4.66667
20	Saltwater	475		0.583333	6	0.55	6	0.533333	7.33333	0.383333	4.33333	0.266667	4.33333	0.15	3.33333

## Sheet: Vegetation cover
	100m			Average vegetation cover	500m			Average vegetation cover	1km			Average vegetation cover	3km			Average vegetation cover	5km			Average vegetation cover	10km			Average vegetation cover
Lakes	sample1	sample2	sample3		sample1	sample2	sample3		sample1	sample2	sample3		sample1	sample2	sample3		sample1	sample2	sample3		sample1	sample2	sample3
1	0.75	0.9	0.8	0.816667	0.7	0.6	0.75	0.683333	0.75	0.6	0.55	0.633333	0.55	0.5	0.6	0.55	0.35	0.5	0.45	0.433333	0.4	0.4	0.3	0.366667
2	0.9	0.85	0.9	0.883333	0.9	0.8	0.85	0.85	0.8	0.65	0.7	0.716667	0.4	0.5	0.45	0.45	0.5	0.5	0.3	0.433333	0.2	0.1	0.2	0.166667
3	0.85	0.7	0.8	0.783333	0.65	0.7	0.8	0.716667	0.7	0.75	0.75	0.733333	0.6	0.7	0.65	0.65	0.6	0.6	0.7	0.633333	0.6	0.5	0.55	0.55
4	0.65	0.7	0.6	0.65	0.6	0.55	0.55	0.566667	0.5	0.6	0.3	0.466667	0.35	0.5	0.6	0.483333	0.4	0.5	0.4	0.433333	0.5	0.4	0.4	0.433333
5	0.6	0.55	0.7	0.616667	0.5	0.5	0.4	0.466667	0.4	0.3	0.45	0.383333	0.3	0.2	0.3	0.266667	0.2	0.1	0.3	0.2	0.15	0.3	0.2	0.216667
6	0.9	0.9	0.8	0.866667	0.9	0.85	0.8	0.85	0.8	0.85	0.8	0.816667	0.75	0.6	0.75	0.7	0.7	0.6	0.8	0.7	0.4	0.7	0.6	0.566667
7	0.7	0.5	0.8	0.666667	0.6	0.5	0.7	0.6	0.55	0.4	0.5	0.483333	0.3	0.4	0.4	0.366667	0.2	0.1	0.2	0.166667	0.2	0.3	0.2	0.233333
8	0.95	0.85	0.9	0.9	0.9	0.9	0.9	0.9	0.85	0.9	0.85	0.866667	0.8	0.65	0.7	0.716667	0.7	0.4	0.6	0.566667	0.6	0.6	0.5	0.566667
9	0.6	0.75	0.7	0.683333	0.7	0.7	0.5	0.633333	0.6	0.5	0.65	0.583333	0.35	0.5	0.5	0.45	0.3	0.5	0.3	0.366667	0.2	0.3	0.55	0.35
10	0.9	0.85	0.85	0.866667	0.8	0.9	0.7	0.8	0.8	0.85	0.8	0.816667	0.8	0.75	0.8	0.783333	0.75	0.75	0.7	0.733333	0.7	0.65	0.7	0.683333
11	0.5	0.5	0.4	0.466667	0.6	0.6	0.75	0.65	0.5	0.65	0.6	0.583333	0.5	0.5	0.6	0.533333	0.4	0.4	0.5	0.433333	0.6	0.5	0.55	0.55
12	0.4	0.3	0.4	0.366667	0.6	0.5	0.7	0.6	0.6	0.55	0.6	0.583333	0.5	0.45	0.6	0.516667	0.3	0.2	0.2	0.233333	0.1	0.2	0.1	0.133333
13	0.8	0.85	0.8	0.816667	0.75	0.8	0.7	0.75	0.7	0.7	0.6	0.666667	0.7	0.6	0.6	0.633333	0.6	0.65	0.6	0.616667	0.5	0.6	0.5	0.533333
14	0.65	0.7	0.8	0.716667	0.7	0.6	0.65	0.65	0.55	0.6	0.45	0.533333	0.35	0.5	0.4	0.416667	0.2	0.15	0.2	0.183333	0.1	0.15	0.2	0.15
15	0.9	0.8	0.8	0.833333	0.75	0.65	0.55	0.65	0.6	0.7	0.6	0.633333	0.65	0.75	0.6	0.666667	0.5	0.55	0.5	0.516667	0.55	0.6	0.4	0.516667
16	0.8	0.55	0.6	0.65	0.6	0.4	0.55	0.516667	0.5	0.4	0.5	0.466667	0.3	0.25	0.4	0.316667	0.3	0.2	0.2	0.233333	0.1	0.1	0.15	0.116667
17	0.7	0.65	0.8	0.716667	0.6	0.55	0.6	0.583333	0.6	0.45	0.6	0.55	0.4	0.45	0.35	0.4	0.2	0.3	0.25	0.25	0.2	0.3	0.3	0.266667
18	0.65	0.7	0.6	0.65	0.6	0.5	0.65	0.583333	0.7	0.6	0.5	0.6	0.5	0.35	0.4	0.416667	0.1	0.25	0.2	0.183333	0.1	0.25	0.1	0.15
19	0.55	0.5	0.6	0.55	0.6	0.65	0.6	0.616667	0.45	0.6	0.4	0.483333	0.3	0.4	0.25	0.316667	0.3	0.35	0.3	0.316667	0.2	0.25	0.2	0.216667
20	0.6	0.55	0.6	0.583333	0.7	0.5	0.45	0.55	0.5	0.5	0.6	0.533333	0.4	0.45	0.3	0.383333	0.3	0.25	0.25	0.266667	0.1	0.2	0.15	0.15

## Sheet: Plant species
Lakes	100m			Average plant species	500m			Average plant species	1km			Average plant species	3km			Average plant species	5km			Average plant species	10km			Average plant species
	sample1	sample2	sample3		sample1	sample2	sample3		sample1	sample2	sample3		sample1	sample2	sample3		sample1	sample2	sample3		sample1	sample2	sample3
1	9	12	14	11.6667	10	5	8	7.66667	7	5	6	6	8	4	5	5.66667	3	5	4	4	4	6	4	4.66667
2	15	11	13	13	13	12	14	13	12	7	8	9	6	7	9	7.33333	4	5	5	4.66667	3	6	4	4.33333
3	9	12	10	10.3333	8	14	9	10.3333	5	6	11	7.33333	8	9	4	7	7	5	7	6.33333	11	4	5	6.66667
4	7	10	6	7.66667	11	4	6	7	9	12	4	8.33333	6	7	6	6.33333	7	4	5	5.33333	6	5	7	6
5	5	3	7	5	4	6	6	5.33333	5	3	2	3.33333	6	3	4	4.33333	4	4	5	4.33333	3	3	5	3.66667
6	12	9	14	11.6667	13	11	7	10.3333	9	12	6	9	10	5	8	7.66667	7	7	9	7.66667	5	6	8	6.33333
7	7	10	6	7.66667	12	7	11	10	10	9	5	8	9	4	11	8	5	9	3	5.66667	7	4	6	5.66667
8	16	9	11	12	14	11	7	10.6667	13	9	12	11.3333	9	7	13	9.66667	6	10	7	7.66667	9	5	7	7
9	7	10	5	7.33333	5	10	7	7.33333	6	5	7	6	9	4	5	6	6	6	8	6.66667	5	7	4	5.33333
10	23	19	17	19.6667	24	15	19	19.3333	17	14	13	14.6667	12	15	9	12	15	10	9	11.3333	11	12	7	10
11	6	8	4	6	8	7	9	8	6	7	10	7.66667	5	5	7	5.66667	6	8	3	5.66667	4	5	4	4.33333
12	5	5	4	4.66667	8	3	6	5.66667	6	5	7	6	5	3	4	4	4	4	5	4.33333	3	5	4	4
13	12	15	11	12.6667	13	16	12	13.6667	11	9	13	11	12	10	8	10	8	11	6	8.33333	8	9	6	7.66667
14	8	5	7	6.66667	5	7	7	6.33333	10	6	8	8	7	9	5	7	6	7	6	6.33333	5	7	8	6.66667
15	11	15	8	11.3333	14	9	11	11.3333	9	10	13	10.6667	8	10	7	8.33333	10	8	9	9	11	7	8	8.66667
16	14	11	8	11	12	11	14	12.3333	10	11	8	9.66667	12	7	6	8.33333	7	9	11	9	6	5	9	6.66667
17	9	8	12	9.66667	11	7	10	9.33333	9	11	13	11	6	9	5	6.66667	7	8	7	7.33333	4	7	5	5.33333
18	10	7	8	8.33333	5	11	7	7.66667	14	8	6	9.33333	7	4	10	7	5	7	9	7	4	6	4	4.66667
19	5	8	6	6.33333	7	8	6	7	10	4	8	7.33333	5	7	4	5.33333	6	8	4	6	6	3	5	4.66667
20	10	5	3	6	7	5	6	6	7	6	9	7.33333	5	5	3	4.33333	4	6	3	4.33333	5	2	3	3.33333
